# Supplementary material
Source: Springer Nature journal article supplement (https://www.springermedizin.de/resource/supplementary/12943_2012_1030_MOESM6_ESM.pdf/9552094)
Supplement: MOESM6 [file 9552094]

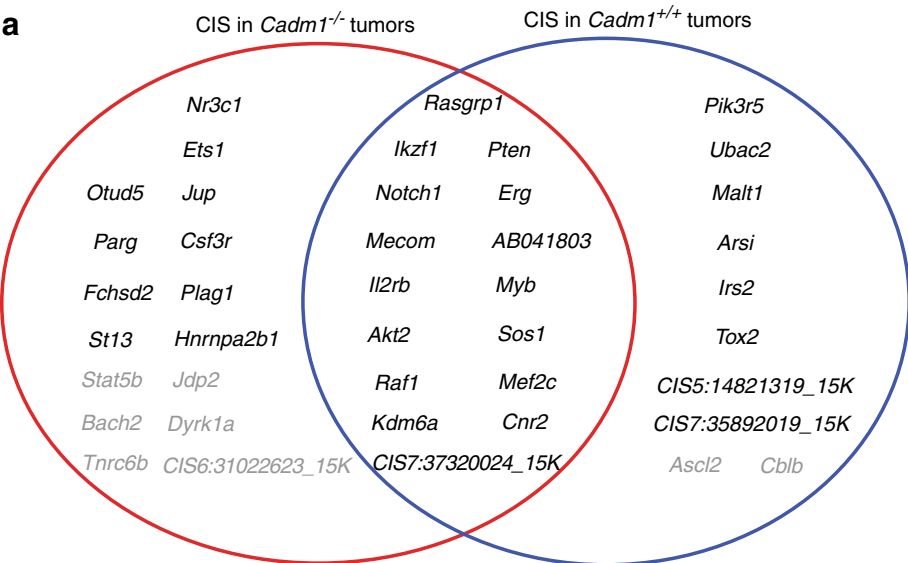

**b**

| Gene             | Chr | CIS Peak Location | Tumors in CIS | GKC P-value | GKC Scale |
|------------------|-----|-------------------|---------------|-------------|-----------|
| <i>Nr3c1</i>     | 18  | 39585077          | 14            | < 1.57E-12  | 15000     |
| <i>Otud5</i>     | X   | 7438337           | 5             | 1.5689E-12  | 15000     |
| <i>Hnrnpa2b1</i> | 6   | 51418312          | 6             | 5.3197E-05  | 15000     |
| <i>Parg</i>      | 14  | 33063823          | 6             | 0.0083      | 15000     |
| <i>Plag1</i>     | 4   | 3860295           | 7             | 0.0271      | 15000     |
| <i>St13</i>      | 15  | 81210375          | 7             | 0.0325      | 15000     |
| <i>Jup</i>       | 11  | 100246533         | 5             | 0.0366      | 15000     |
| <i>Ets1</i>      | 9   | 32492424          | 14            | 0.0412      | 30000     |
| <i>Fchsd2</i>    | 7   | 108287046         | 9             | 0.0418      | 15000     |
| <i>Csf3r</i>     | 4   | 125694401         | 5             | 0.0458      | 15000     |
